# Supplementary material for: Predictors of COVID-19 Vaccine Hesitancy in South African Local Communities: The VaxScenes Study
Source: MDPI journal article supplement (doi:10.3390/vaccines10030353), 2022-02-25
Supplement: s1 [file s1]

# Predictors of COVID-19 Vaccine Hesitancy in South African Local Communities: The VaxScenes Study

## Authors

Patrick DMC Katoto<sup>1,2,3</sup>, Saahier Parker<sup>4</sup>, Nancy Coulson<sup>5</sup>, Nirvana Pillay<sup>5</sup>, Sara Cooper<sup>1</sup>, Anelisa Jaca<sup>6</sup>, Edison Mavundza<sup>1</sup>, Gregory Houston<sup>4</sup>, Candice Groenewald<sup>4</sup>, Zaynab Essack<sup>4</sup>, Jane Simmonds<sup>6</sup>, Londiwe Deborah Shandu<sup>1</sup>, Marilyn Couch<sup>4</sup>, Nonkululeko Khuzwayo<sup>4</sup>, Nobukhosi Ncube<sup>5</sup>, Phelele Bhengu<sup>1,7</sup>, Heidi van Rooyen<sup>4,8</sup>, \*Charles Shey Wiysonge<sup>1,9,10</sup>

## Supplementary materials

**Table S1: Four case study sites by province, ward, settlement type, population, and COVID-19 statistics as of 29 January 2021.**

| Case Study Site | Province      | Ward                                            | Type            | Population            | Provincial COVID-19 Data*      |
|-----------------|---------------|-------------------------------------------------|-----------------|-----------------------|--------------------------------|
| Alexandra       | Gauteng       | Ward 76, Region E City of Johannesburg          | Urban, informal | 798 014 (2011 Census) | 386 770 cases<br>10 195 deaths |
| Rylands Estate  | Western Cape  | Ward 46, Athlone, City of Cape Town             | Urban           | 32 199                | 268 507 cases<br>10,247 deaths |
| Sweetwaters     | KwaZulu Natal | Vulundlela, Umgungundlovu District Municipality | Semi-Rural      | 18 587                | 311 877 cases<br>8 443deaths   |
| Wentworth       | KwaZulu Natal | Ward 66, eThekweni Municipality                 | Urban           | 145 949 (2016 Census) |                                |

\*Source:<https://sacoronavirus.co.za/2021/01/29/update-on-COVID-19-29th-january-2021/>.

**Table S2: Supplemental questions related to COVID-19 and COVID-19 vaccine.**

| <b>Variables</b>                                                                                     | <b>Respondents<br/>n (%)</b> |
|------------------------------------------------------------------------------------------------------|------------------------------|
| <b>Do you think the following people in your community would want you to get a COVID-19 vaccine?</b> |                              |
| <b>Family and friend</b>                                                                             |                              |
| Yes                                                                                                  | 701<br>(59.7%)               |
| No                                                                                                   | 176<br>(15.0%)               |
| Not sure                                                                                             | 297<br>(25.3%)               |
| <b>The local ward councillor/s</b>                                                                   |                              |
| Yes                                                                                                  | 714<br>(60.9%)               |
| No                                                                                                   | 88<br>(7.50%)                |
| Not sure                                                                                             | 371<br>(31.6%)               |
| <b>Local leaders in political parties</b>                                                            |                              |
| Yes                                                                                                  | 692<br>(60.1%)               |
| No                                                                                                   | 95<br>(8.25%)                |
| Not sure                                                                                             | 365<br>(31.7%)               |
| <b>Traditional leaders</b>                                                                           |                              |
| Yes                                                                                                  | 371<br>(32.4%)               |
| No                                                                                                   | 186<br>(16.2%)               |

|                                                                                                                                         |                |
|-----------------------------------------------------------------------------------------------------------------------------------------|----------------|
| Not sure                                                                                                                                | 589<br>(51.4%) |
| <b>Religious leaders</b>                                                                                                                |                |
| Yes                                                                                                                                     | 660<br>(57.3%) |
| No                                                                                                                                      | 146<br>(12.7%) |
| Not sure                                                                                                                                | 346<br>(30.0%) |
| <b>Do you think most adults you know in this local community will get a COVID-19 vaccine, if government makes it available to them?</b> |                |
| Yes                                                                                                                                     | 855<br>(73.1%) |
| No                                                                                                                                      | 84<br>(7.19%)  |
| Not sure                                                                                                                                | 230<br>(19.7%) |
| <b>What do you think would help ensure that as many people as possible in your community get the COVID-19 vaccine?</b>                  |                |
| Make vaccines available as quickly as possible to all adults                                                                            | 880<br>(73.8%) |
| Ensure the COVID-19 vaccine is free                                                                                                     | 885<br>(74.2%) |
| Publicly vaccinate community leaders                                                                                                    | 726<br>(60.9%) |
| Provide more education about the COVID-19 vaccine                                                                                       | 827<br>(69.3%) |
| Involve religious and community leaders in COVID-19 education programmes                                                                | 800<br>(67.1%) |
| Encourage community participation through ward councilors                                                                               | 765<br>(64.1%) |
| Make information easily available online                                                                                                | 704<br>(59.0%) |
| <b>If you hear confusing information related to the COVID-19 vaccine, who would you go to for reliable information?</b>                 |                |
| A family member                                                                                                                         | 154<br>(13.7%) |

|                                                                                                                      |                |
|----------------------------------------------------------------------------------------------------------------------|----------------|
| A friend or neighbor                                                                                                 | 29<br>(2.57%)  |
| A nurse or doctor                                                                                                    | 594<br>(52.7%) |
| A community outreach worker (community health worker)                                                                | 60<br>(5.32%)  |
| A traditional healer                                                                                                 | 6<br>(0.53%)   |
| An online search                                                                                                     | 238<br>(21.1%) |
| I don't check information that I receive                                                                             | 47<br>(4.17%)  |
| <b>Where would you prefer to get a COVID-19 vaccine?</b>                                                             |                |
| Hospital                                                                                                             | 222<br>(19.6%) |
| Health clinic                                                                                                        | 298<br>(26.3%) |
| Workplace                                                                                                            | 58<br>(5.12%)  |
| Pharmacy                                                                                                             | 206<br>(18.2%) |
| Community centre, meeting hall, or local shopping centre                                                             | 205<br>(18.1%) |
| I don't want the vaccine                                                                                             | 144<br>(12.7%) |
| <b>Do you think people who do not get the COVID-19 vaccine are taking a risk with</b>                                |                |
| Their own health                                                                                                     | 159<br>(13.6%) |
| The health of the wider community                                                                                    | 68<br>(5.80%)  |
| Both their own health AND that of the wider community                                                                | 775<br>(66.1%) |
| They are not taking unnecessary risks                                                                                | 170<br>(14.5%) |
| <b>How much do you trust the National Government to manage the rollout of the COVID-19 vaccine for South Africa?</b> |                |

|                                                                                                          |                |
|----------------------------------------------------------------------------------------------------------|----------------|
| Not at all                                                                                               | 254<br>(21.3%) |
| A little                                                                                                 | 274<br>(23.0%) |
| Moderately                                                                                               | 396<br>(33.2%) |
| Very much                                                                                                | 267<br>(22.4%) |
| <b>How much do you trust the pharmaceutical industry in its development of the COVID-19 vaccine?</b>     |                |
| Not at all                                                                                               | 198<br>(16.6%) |
| A little                                                                                                 | 249<br>(20.9%) |
| Moderately                                                                                               | 439<br>(36.9%) |
| Very much                                                                                                | 305<br>(25.6%) |
| <b>How much trust do you have in the scientists advising National Government about COVID-19 vaccine?</b> |                |
| Not at all                                                                                               | 183<br>(15.4%) |
| A little                                                                                                 | 206<br>(17.3%) |
| Moderately                                                                                               | 396<br>(33.3%) |
| Very much                                                                                                | 405<br>(34.0%) |
| <b>Will you continue to wear a mask after you are vaccinated?</b>                                        |                |
| Yes                                                                                                      | 773<br>(94.6%) |
| No                                                                                                       | 28<br>(3.43%)  |
| Not sure                                                                                                 | 16<br>(1.96%)  |

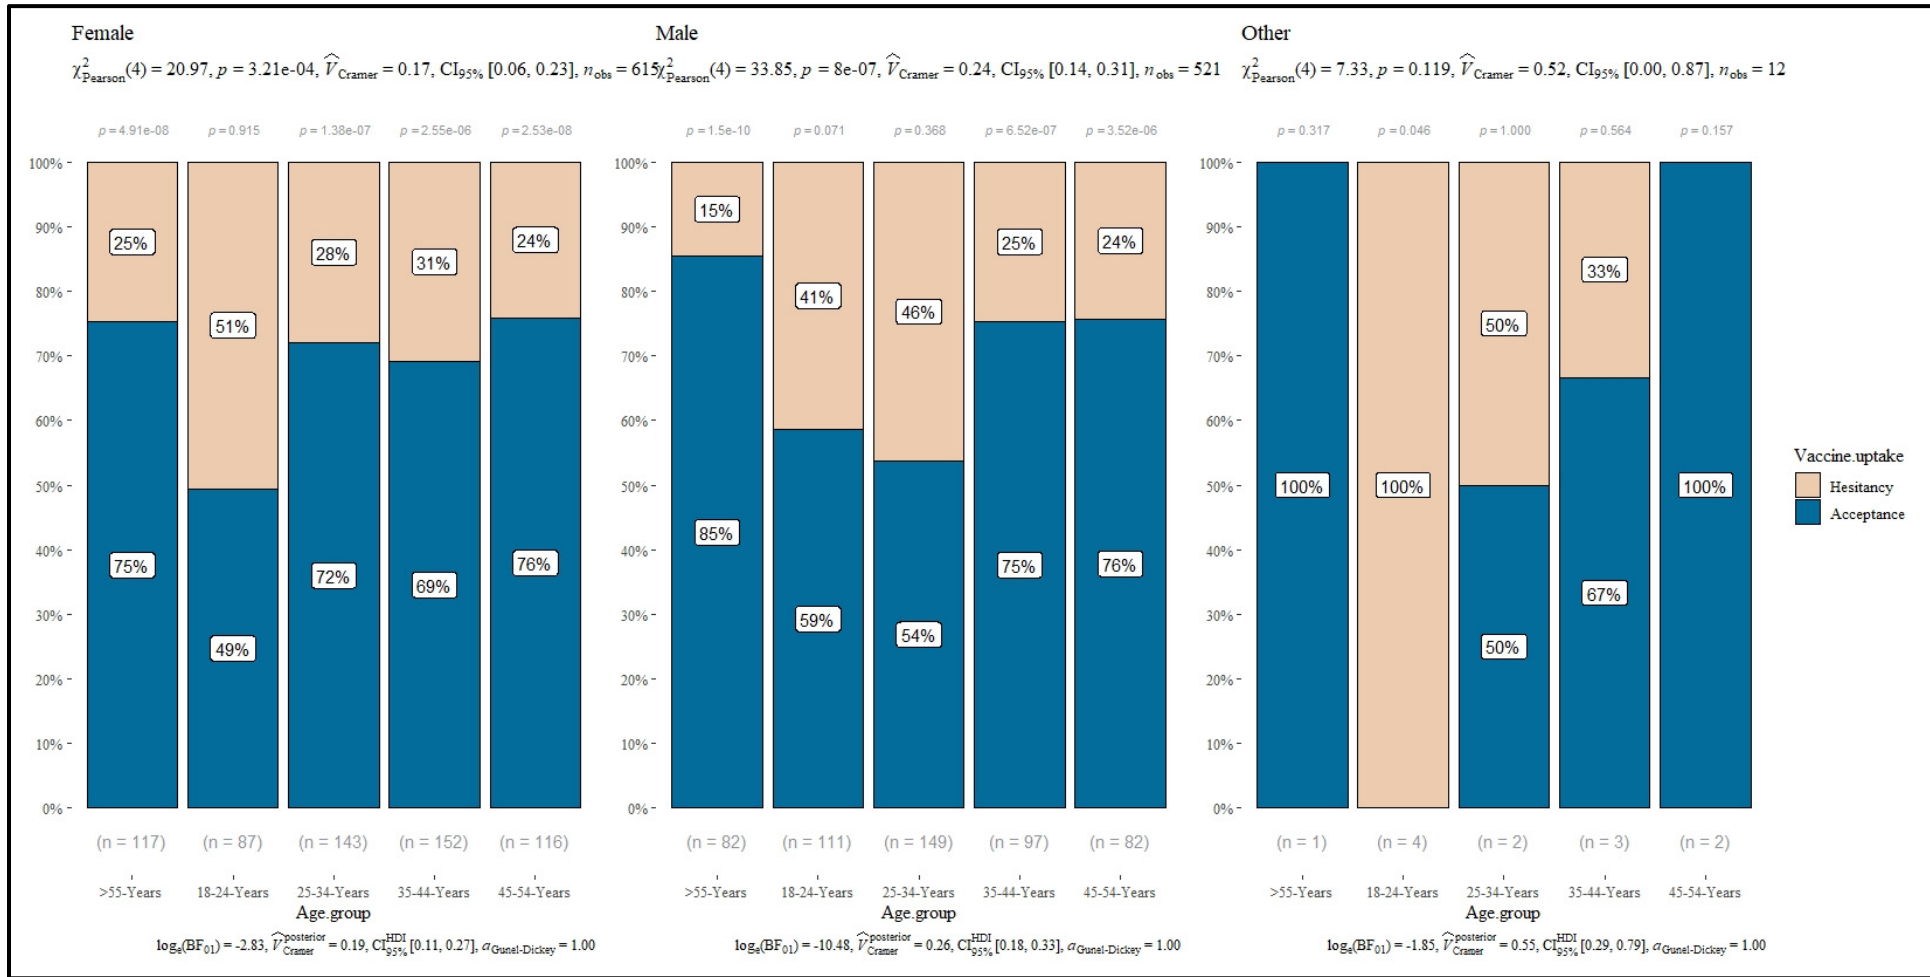

## Below matric

 $\chi^2_{\text{Pearson}}(4) = 25.93, p = 3.27e-05, \hat{V}_{\text{Cramer}} = 0.23, \text{CI}_{95\%} [0.11, 0.32], n_{\text{obs}} = 399$ 

## Matric or above

 $\chi^2_{\text{Pearson}}(4) = 27.04, p = 1.95e-05, \hat{V}_{\text{Cramer}} = 0.18, \text{CI}_{95\%} [0.09, 0.24], n_{\text{obs}} = 747$ 
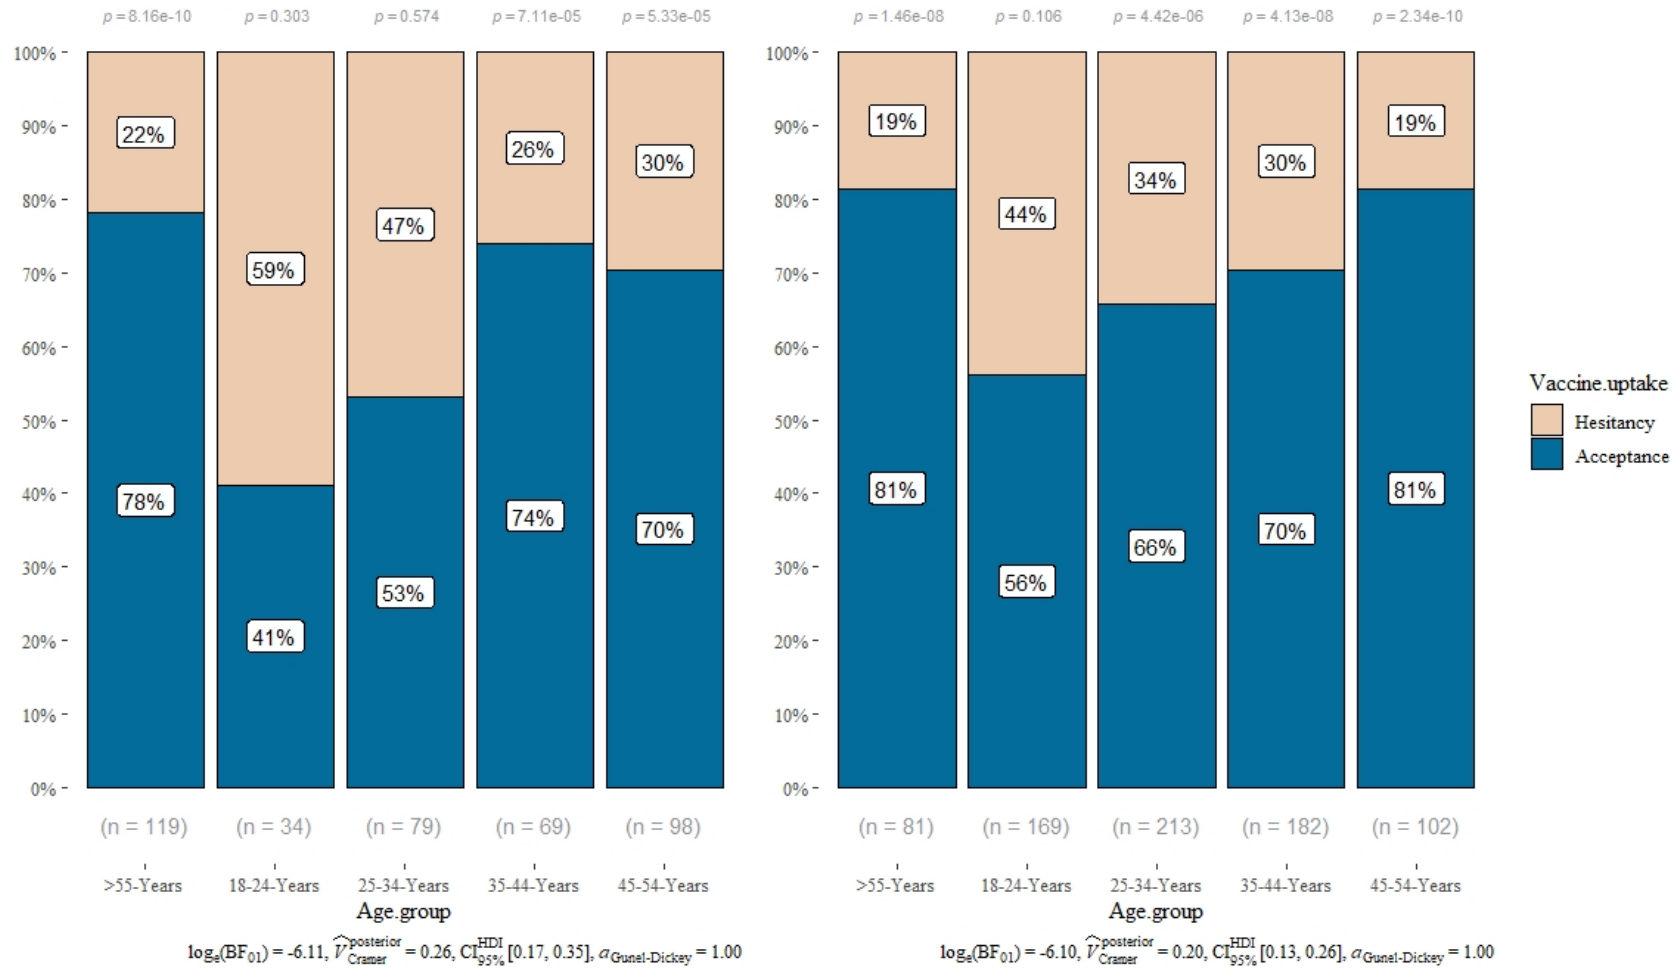

## Alexandria - Gauteng

 $\chi^2_{\text{Pearson}}(4) = 5.78, p = 0.216, \hat{V}_{\text{Cramer}} = 0.08, \text{CI}_{95\%} [0.00, 0.14], n_{\text{obs}} = 297$ 
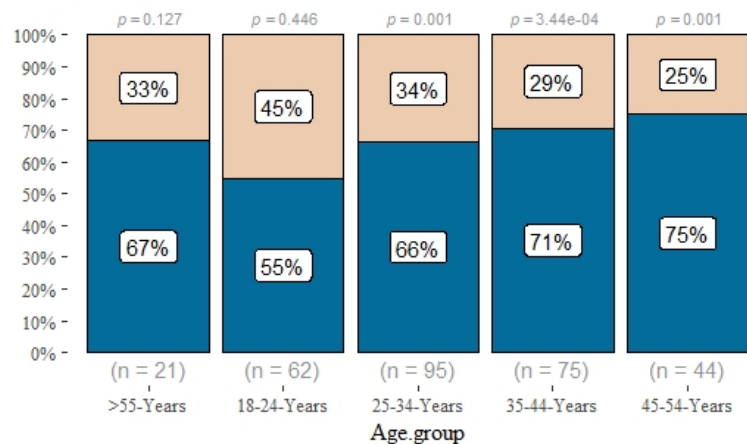
 $\log_e(\text{BF}_{01}) = 3.16, \hat{V}_{\text{Cramer}}^{\text{posterior}} = 0.16, \text{CI}_{95\%}^{\text{HDI}} [0.07, 0.26], \alpha_{\text{Gunnell-Dickey}} = 1.00$ 

## Rylands Estate – Western Cape

 $\chi^2_{\text{Pearson}}(4) = 6.37, p = 0.173, \hat{V}_{\text{Cramer}} = 0.09, \text{CI}_{95\%} [0.00, 0.16], n_{\text{obs}} = 305$ 
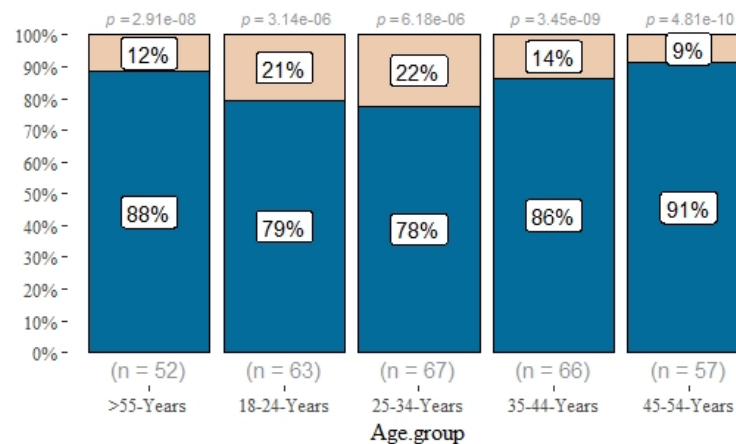
 $\log_e(\text{BF}_{01}) = 1.70, \hat{V}_{\text{Cramer}}^{\text{posterior}} = 0.17, \text{CI}_{95\%}^{\text{HDI}} [0.08, 0.26], \alpha_{\text{Gunnell-Dickey}} = 1.00$ 

Vaccine uptake

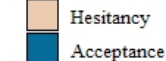

## Sweetwaters – KwaZulu-Natal

 $\chi^2_{\text{Pearson}}(4) = 43.13, p = 9.71\text{e-}09, \hat{V}_{\text{Cramer}} = 0.40, \text{CI}_{95\%} [0.25, 0.51], n_{\text{obs}} = 251$ 
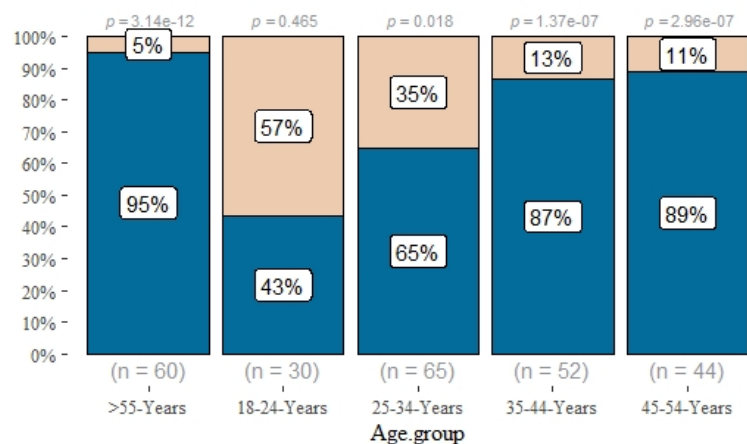
 $\log_e(\text{BF}_{01}) = -15.51, \hat{V}_{\text{Cramer}}^{\text{posterior}} = 0.41, \text{CI}_{95\%}^{\text{HDI}} [0.30, 0.52], \alpha_{\text{Gunnell-Dickey}} = 1.00$ 

## Wentworth – KwaZulu-Natal

 $\chi^2_{\text{Pearson}}(4) = 17.61, p = 0.001, \hat{V}_{\text{Cramer}} = 0.21, \text{CI}_{95\%} [0.06, 0.31], n_{\text{obs}} = 297$ 
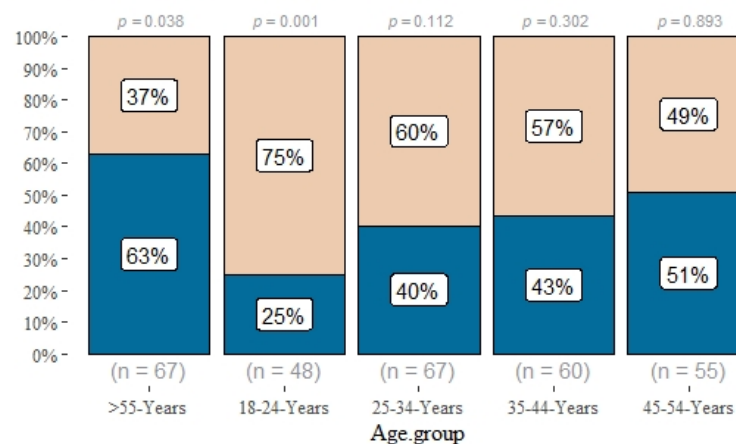
 $\log_e(\text{BF}_{01}) = -2.99, \hat{V}_{\text{Cramer}}^{\text{posterior}} = 0.25, \text{CI}_{95\%}^{\text{HDI}} [0.15, 0.35], \alpha_{\text{Gunnell-Dickey}} = 1.00$



**Figure S1: Age-groups distribution of COVID-19 vaccine uptake.** Analyses by gender (A), level of education (B) and study sites (C) among respondents from four local communities in South Africa, from 6 June to 30 June 2021.
